# Supplementary material
Source: PubMed Central journal article supplement (PMC3251126)
Supplement: 1109656108_pnas.201109656SI.pdf [file 1109656108_pnas.201109656SI.pdf]

# Supporting Information

Song et al. 10.1073/pnas.1109656108

**Table S1. SC injection sites**

| Injection | Monkey | Amplitude (°) | Direction (°) | Agent    | Task(s) |
|-----------|--------|---------------|---------------|----------|---------|
| 1         | J      | 15            | 135           | Muscimol | 1       |
| 2         | J      | 10            | 345           | Muscimol | 1, 2    |
| 3         | J      | 12            | 160           | Muscimol | 1, 2    |
| 4         | J      | 4             | 20            | Muscimol | 1, 2    |
| 5         | J      | 11            | 85            | Muscimol | 1, 2    |
| 6         | J      | 8             | 35            | Muscimol | 1, 2    |
| 7         | J      | 15            | 205           | Muscimol | 1, 2    |
| 8         | K      | 10            | 330           | Muscimol | 1, 2    |
| 9         | K      | 12            | 145           | Muscimol | 1, 2    |
| 10        | K      | 4             | 25            | Muscimol | 1       |
| 11        | K      | 8             | 190           | Muscimol | 1, 2    |
| 12        | K      | 6             | 355           | Muscimol | 1, 2    |
| 13        | J      | 15            | 230           | Saline   | 1, 2    |
| 14        | J      | 13            | 25            | Saline   | 1, 2    |
| 15        | K      | 15            | 215           | Muscimol | 2       |
| 16        | J      | 15            | 320           | Saline   | 1, 2    |
| 17        | K      | 7             | 145           | Muscimol | 1       |
| 18        | K      | 5             | 85            | Saline   | 1, 2    |
| 19        | K      | 10            | 330           | Saline   | 1, 2    |
| 20        | K      | 7             | 25            | Muscimol | 1, 2    |

The amplitude and direction columns indicate the location, in visual field coordinates, represented at each injection site, as estimated from the electrically evoked saccades obtained (details are provided in *Materials and Methods*). All injections were of a volume of 0.5  $\mu$ L of the indicated agent. All muscimol injections were of a concentration of 0.5  $\mu$ g/ $\mu$ L. In the task(s) column, 1 indicates that the monkey was tested in the distractor task and 2 indicates that the monkey was tested in the centrally cued task.
